# Supplementary material for: Regio- and stereoselective synthesis of novel isoxazolidine heterocycles by 1,3-dipolar cycloaddition between C-phenyl-N-methylnitrone and substituted alkenes. Experimental and DFT investigation of selectivity and mechanism
Source: Royal Society of Chemistry journal article supplement (doi:10.1039/c7ra00258k), 2017-01-01
Supplement: c7ra00258k1.pdf [file c7ra00258k1.pdf]

## Supplementary Information

### Regio- and stereoselective synthesis of novel isoxazolidines heterocycles by 1,3-dipolar cycloaddition between *C*-phenyl-*N*-methylnitron and substituted alkenes. Experimental and DFT investigation of selectivity and mechanism

Djamila Hellel<sup>a</sup>, Fouad Chafaa<sup>a</sup>, Abdelmalek Khorief Nacereddine<sup>a,b</sup>, Abdelhafid Djerourou<sup>a</sup> and Emmanuel Vrancken<sup>c</sup>

<sup>a</sup>Laboratoire de Synthèse et Biocatalyse Organique, Département de Chimie, Faculté des Sciences, Université Badji Mokhtar Annaba, BP 12, 23000 Annaba, Algeria.

<sup>b</sup>Département de Physique et Chimie, Ecole Normale Supérieure d'Enseignement Technologique de Skikda, Cité des frères Boucetta, Azzaba, Skikda, Algeria

<sup>c</sup> Institut Charles Gerhardt, UMR 5253 CNRS-UM2-UM1 ENSCM, Laboratoire Architectures Moléculaires et Matériaux Nanostructurés (AM2N), Ecole Nationale Supérieure de Chimie de Montpellier, 8 Rue de l'Ecole Normale, 34296 Montpellier, France.

### Contents

**S2.** Characterization data and spectroscopic detail for nitron **1**

**S2. Table S1.** B3LYP/6-31G(d) total (E, in a.u.) and relative ( $\Delta E$ , in kcal·mol<sup>-1</sup>) energies, in gas phase, of the stationary points involved in the 13DC reaction of nitron **1** with alkene **2a**.

**S2. Table S2.** B3LYP/6-31G(d) total enthalpies (H, in a.u.), entropies (S, in cal mol<sup>-1</sup>K<sup>-1</sup>) and Gibbs free energies (G, in a.u.), for the stationery points involved in the 13DC between nitron **1** and alkene **2a**.

**S3. Table S3.** B3LYP/6-31G(d) total (E, in a.u.) and relative ( $\Delta E$ , in kcal·mol<sup>-1</sup>) energies, in gas phase, of the stationary points involved in the 13DC reaction of nitron **1** with alkene **2d**.

**S3. Table S4.** B3LYP/6-31G(d) total enthalpies (H, in a.u.), entropies (S, in cal mol<sup>-1</sup>K<sup>-1</sup>) and Gibbs free energies (G, in a.u.), for the stationery points involved in the 13DC between nitron **1** and alkene **2d**.

**S3. Table S5.** B3LYP/6-31G(d) total (E, in a.u.) and relative ( $\Delta E$ , in kcal·mol<sup>-1</sup>) energies, in gas phase, of the stationary points involved in the 13DC reaction of nitron **1** with alkene **2e**.

**S4. Table S6.** B3LYP/6-31G(d) total enthalpies (H, in a.u.), entropies (S, in cal mol<sup>-1</sup>K<sup>-1</sup>) and Gibbs free energies (G, in a.u.), for the stationery points involved in the 13DC between nitron **1** and alkene **2e**.

**S4.** Atomic coordinates (in Å) of the B3LYP/6-31G(d) optimised geometries of stationery points structures.

### Characterization data and spectroscopic detail for nitrone **1**

$R_f = 0.27$  (Et<sub>2</sub>O/ CH<sub>2</sub>Cl<sub>2</sub>) as crystals (recrystallized from diethyl ether).

IR (KBr) : 3055 v C-H, 2993 vC-H, 1589vC=N, 1558v C=C, 1080vN-C, 1296vN-O.

MS: [M]<sup>+</sup>=135 (70), 134 (100), 118(20), 107(25), 89 (30), 77(50), 65(30), 44(73).

<sup>1</sup>H NMR (CDCl<sub>3</sub>, 400 MHz): 3.75 (s, 3H, CH<sub>3</sub>); 7.28-7.38 (m, 5H, C<sub>6</sub>H<sub>5</sub>), 8.15 (q, 1H, J=3.22 Hz, CH=N).

**Table S1.** B3LYP/6-31G(d) total (E, in a.u.) and relative ( $\Delta E$ , in kcal·mol<sup>-1</sup>) energies, in gas phase, of the stationary points involved in the 13DC reaction of nitrone **1** with alkene **2a**.

| System            | E            | $\Delta E$ |
|-------------------|--------------|------------|
| <b>Alkene 2a</b>  | -422.9759669 |            |
| <b>Nitronne 1</b> | -440.1687323 |            |
| <b>TS-a-mn</b>    | -863.1238497 | 13.08      |
| <b>TS-a-mx</b>    | -863.1206696 | 15.08      |
| <b>TS-a-on</b>    | -863.1166294 | 17.61      |
| <b>TS-a-ox</b>    | -863.1173735 | 17.15      |
| <b>CA-a-mn</b>    | -863.164208  | -12.24     |
| <b>CA-a-mx</b>    | -863.1624402 | -11.13     |
| <b>CA-a-on</b>    | -863.1599374 | -9.56      |
| <b>CA-a-ox</b>    | -863.1633643 | -11.71     |

**Table S2.** B3LYP/6-31G(d) total enthalpies (H, in a.u.), entropies (S, in cal mol<sup>-1</sup>K<sup>-1</sup>) and Gibbs free energies (G, in a.u.), for the stationery points involved in the 13DC between nitrone **1** and alkene **2a**.

| System            | H           | S       | G           |
|-------------------|-------------|---------|-------------|
| <b>Alkene 2a</b>  | -422.839105 | 103.872 | -422.902528 |
| <b>Nitronne 1</b> | -440.021877 | 103.085 | -440.084819 |
| <b>TS-a-mn</b>    | -862.836946 | 160.036 | -862.934662 |
| <b>TS-a-mx</b>    | -862.833627 | 160.7   | -862.931749 |
| <b>TS-a-on</b>    | -862.830376 | 159.343 | -862.927668 |
| <b>TS-a-ox</b>    | -862.830417 | 159.531 | -862.927825 |
| <b>CA-a-mn</b>    | -862.872782 | 160.141 | -862.970562 |
| <b>CA-a-mx</b>    | -862.870968 | 160.419 | -862.968918 |
| <b>CA-a-on</b>    | -862.868324 | 158.058 | -862.964832 |
| <b>CA-a-ox</b>    | -862.871644 | 160.01  | -862.969344 |

**Table S3.** B3LYP/6-31G(d) total (E, in a.u.) and relative ( $\Delta E$ , in kcal·mol<sup>-1</sup>) energies, in gas phase, of the stationary points involved in the 13DC reaction of nitrone **1** with alkene **2d**.

| System           | E           | $\Delta E$ |
|------------------|-------------|------------|
| <b>Nitron 1</b>  | -440.168732 |            |
| <b>Alkene 2d</b> | -269.349344 |            |
| <b>TS-d-on</b>   | -709.488685 | 18.44      |
| <b>TS-d-ox</b>   | -709.493491 | 15.43      |
| <b>TS-d-mn</b>   | -709.496283 | 13.68      |
| <b>TS-d-mx</b>   | -709.500402 | 11.09      |
| <b>CA-d-on</b>   | -709.543075 | -15.69     |
| <b>CA-d-ox</b>   | -709.545595 | -17.27     |
| <b>CA-d-mn</b>   | -709.549365 | -19.63     |
| <b>CA-d-mx</b>   | -709.552707 | -21.73     |

**Table S4.** B3LYP/6-31G(d) total enthalpies (H, in a.u), entropies (S, in cal mol<sup>-1</sup>K<sup>-1</sup>) and Gibbs free energies (G, in a.u.) for the stationary points involved in the 13DC between nitrone **1** and alkene **2d**.

| System           | H           | S       | G           |
|------------------|-------------|---------|-------------|
| <b>Nitron 1</b>  | -440.021877 | 103.085 | -440.084819 |
| <b>Alkene 2d</b> | -269.257861 | 79.702  | -269.306507 |
| <b>TS-d-on</b>   | -709.247238 | 135.817 | -709.330134 |
| <b>TS-d-ox</b>   | -709.252715 | 137.177 | -709.336441 |
| <b>TS-d-mn</b>   | -709.254373 | 137.225 | -709.338128 |
| <b>TS-d-mx</b>   | -709.25891  | 137.921 | -709.34309  |
| <b>CA-d-on</b>   | -709.297281 | 134.141 | -709.379154 |
| <b>CA-d-ox</b>   | -709.299436 | 135.044 | -709.38186  |
| <b>CA-d-mn</b>   | -709.303247 | 134.318 | -709.385227 |
| <b>CA-d-mx</b>   | -709.306405 | 135.508 | -709.389112 |

**Table S5.** B3LYP/6-31G(d) total (E, in a.u.) and relative ( $\Delta E$ , in kcal·mol<sup>-1</sup>) energies, in gas phase, of the stationary points involved in the 13DC reaction of nitrone **1** with alkene **2e**.

| System           | E           | $\Delta E$ |
|------------------|-------------|------------|
| <b>Alkene 2e</b> | -403.128930 |            |
| <b>Nitron 1</b>  | -440.168732 |            |
| <b>TS-e-mn</b>   | -843.257674 | 25.09      |
| <b>TS-e-mx</b>   | -843.260581 | 23.27      |
| <b>TS-e-on</b>   | -843.266636 | 19.47      |
| <b>TS-e-ox</b>   | -843.267973 | 18.63      |
| <b>CA-e-mn</b>   | -843.309746 | -7.58      |
| <b>CA-e-mx</b>   | -843.311227 | -8.51      |
| <b>CA-e-on</b>   | -843.317355 | -12.36     |
| <b>CA-e-ox</b>   | -843.317470 | -12.43     |

**Table S6.** B3LYP/6-31G(d) total enthalpies (H. in a.u), entropies (S. in cal mol<sup>-1</sup>K<sup>-1</sup>) and Gibbs free energies (G. in a.u.), for the stationery points involved in the 13DC between nitrone **1** and alkene **2e**.

| System           | H           | S       | G           |
|------------------|-------------|---------|-------------|
| <b>Alkene 2e</b> | -402.979204 | 98.053  | -403.039074 |
| <b>Nitron 1</b>  | -440.021877 | 103.085 | -440.084819 |
| <b>TS-e-mn</b>   | -842.957197 | 155.657 | -843.052239 |
| <b>TS-e-mx</b>   | -842.961207 | 156.009 | -843.056465 |
| <b>TS-e-on</b>   | -842.965525 | 154.595 | -843.059918 |
| <b>TS-e-ox</b>   | -842.967557 | 156.577 | -843.063161 |
| <b>CA-e-mn</b>   | -843.005534 | 153.881 | -843.099491 |
| <b>CA-e-mx</b>   | -843.007021 | 153.64  | -843.100831 |
| <b>CA-e-on</b>   | -843.012798 | 153.016 | -843.106228 |
| <b>CA-e-ox</b>   | -843.012718 | 153.259 | -843.106296 |

**Atomic coordinates (in Å) of the B3LYP/6-31G(d) optimised geometries of stationery points structures.**

**Nitron 1: E= -440.168732 a.u**

|   |             |             |             |
|---|-------------|-------------|-------------|
| C | -1.09805300 | -0.78525100 | -0.27378900 |
| H | -1.29314200 | -1.79613000 | -0.61628800 |
| C | 0.28521000  | -0.33824900 | -0.14454500 |
| C | 1.25209200  | -1.31513900 | 0.17502700  |
| C | 0.73393400  | 0.97634800  | -0.38580800 |
| C | 2.59849000  | -0.98503500 | 0.29130500  |
| H | 0.92996700  | -2.33954700 | 0.34385300  |
| C | 2.08324300  | 1.30408500  | -0.26399500 |
| H | 0.03364100  | 1.73851400  | -0.71138700 |
| C | 3.02126200  | 0.33011400  | 0.08161700  |
| H | 3.32025800  | -1.75565800 | 0.54831600  |
| H | 2.40400900  | 2.32404000  | -0.45868100 |
| H | 4.07235300  | 0.58925800  | 0.17185900  |
| N | -2.21218900 | -0.12574900 | -0.01759700 |
| O | -3.36851700 | -0.60976400 | -0.24764200 |
| C | -2.24232400 | 1.21525700  | 0.61169100  |
| H | -1.29269100 | 1.46098400  | 1.08513000  |
| H | -2.49672600 | 1.95370200  | -0.15261800 |
| H | -3.04734000 | 1.17040300  | 1.34511600  |

**Alkene 2a: E= -422.9759669 a.u**

|   |            |            |            |
|---|------------|------------|------------|
| C | 0.00000000 | 0.00000000 | 0.00000000 |
| C | 0.00000000 | 0.00000000 | 1.34960528 |
| C | 1.26027448 | 0.00000000 | 2.09671031 |

|   |             |             |             |
|---|-------------|-------------|-------------|
| O | 1.34259340  | 0.00001106  | 3.31232646  |
| C | -1.14709753 | -0.00000589 | -0.90624652 |
| C | -0.91464631 | -0.00000469 | -2.29404949 |
| C | -1.97277781 | -0.00001012 | -3.20014948 |
| C | -3.28825597 | -0.00001687 | -2.73433229 |
| C | -3.53716241 | -0.00001815 | -1.35769915 |
| C | -2.48103928 | -0.00001273 | -0.45330476 |
| H | 0.97342865  | 0.00000000  | -0.49436800 |
| H | -0.91020017 | -0.00000467 | 1.94387120  |
| H | 2.17641474  | 0.00001489  | 1.46188151  |
| H | 0.10989508  | 0.00000056  | -2.65891608 |
| H | -1.77091719 | -0.00000909 | -4.26767928 |
| H | -4.11649287 | -0.00002112 | -3.43753628 |
| H | -4.55977846 | -0.00002340 | -0.99055371 |
| H | -2.69022106 | -0.00001380 | 0.61215412  |

**TS-a-mn: E= -863.1238497 a.u**

1 imaginary frequency = -422.9294 cm<sup>-1</sup>

|   |             |             |             |
|---|-------------|-------------|-------------|
| N | 0.94961500  | -1.43635100 | -1.51056700 |
| C | 1.69481700  | -0.90522100 | -0.51418900 |
| C | 0.18193400  | -1.30251400 | 1.02473100  |
| C | -0.98821100 | -1.32051600 | 0.21926300  |
| O | -0.29386700 | -1.00477300 | -1.59170600 |
| C | 1.12771900  | -2.83656200 | -1.89444700 |
| C | 0.69671500  | -2.55847400 | 1.57370900  |
| O | 1.54249300  | -2.65246800 | 2.44964900  |
| C | 1.89430200  | 0.54744900  | -0.33247800 |
| C | 2.89331700  | 0.95620900  | 0.56911300  |
| C | 3.17325400  | 2.30730400  | 0.75673500  |
| C | 2.46916200  | 3.27374900  | 0.03480100  |
| C | 1.47934000  | 2.87589200  | -0.86685500 |
| C | 1.18124700  | 1.52581200  | -1.04640000 |
| C | -2.03919900 | -0.28410300 | 0.24775600  |
| C | -3.31905100 | -0.60646900 | -0.23355200 |
| C | -4.34914800 | 0.33178900  | -0.22453200 |
| C | -4.11756800 | 1.61795900  | 0.26573700  |
| C | -2.84832900 | 1.95473200  | 0.74274500  |
| C | -1.81972100 | 1.01541200  | 0.73466700  |
| H | 2.55918600  | -1.50948500 | -0.24696700 |
| H | 0.40364400  | -0.43088600 | 1.63170700  |
| H | -1.36895500 | -2.31138600 | -0.02385200 |
| H | 0.61799600  | -3.49770100 | -1.18134500 |
| H | 0.68262900  | -2.96684900 | -2.88198200 |
| H | 2.19113200  | -3.08328500 | -1.93315000 |

|   |             |             |             |
|---|-------------|-------------|-------------|
| H | 0.25523300  | -3.48010500 | 1.12034900  |
| H | 3.44660300  | 0.20590800  | 1.12925800  |
| H | 3.94654800  | 2.60434500  | 1.45983700  |
| H | 2.69009900  | 4.32847400  | 0.17435900  |
| H | 0.92778600  | 3.62217400  | -1.43246000 |
| H | 0.39914000  | 1.21923700  | -1.72997000 |
| H | -3.50349700 | -1.60615000 | -0.61989200 |
| H | -5.33197400 | 0.05840400  | -0.59924600 |
| H | -4.91850700 | 2.35231100  | 0.27653000  |
| H | -2.65818700 | 2.95431600  | 1.12469700  |
| H | -0.83867800 | 1.29836400  | 1.10171700  |

**TS-a-mx: E= -863.1206696 a.u**

1 imaginary frequency = -424.3045 cm<sup>-1</sup>

|   |             |             |             |
|---|-------------|-------------|-------------|
| N | 0.17821400  | -0.94246200 | 1.42484200  |
| C | 1.16773700  | -0.03527900 | 1.26440500  |
| C | -0.13553600 | 1.23934900  | 0.00265200  |
| C | -0.89555100 | 0.21429300  | -0.62170600 |
| O | -0.35818900 | -1.40133700 | 0.30928500  |
| C | -0.75840200 | -0.81822300 | 2.54477200  |
| C | -2.37312600 | 0.08690300  | -0.51643000 |
| C | -3.00872900 | -1.01999900 | -1.10629900 |
| C | -4.39167400 | -1.16828000 | -1.05049500 |
| C | -5.17589400 | -0.20815700 | -0.40540700 |
| C | -4.56104500 | 0.90246000  | 0.17365100  |
| C | -3.17507100 | 1.05206600  | 0.11351800  |
| C | 0.87601300  | 1.96285600  | -0.77122500 |
| O | 1.33901300  | 3.04974300  | -0.46376100 |
| C | 2.36916400  | -0.28942800 | 0.44326200  |
| C | 3.47301400  | 0.56122300  | 0.63145000  |
| C | 4.65505400  | 0.36283000  | -0.07829100 |
| C | 4.75896600  | -0.69734700 | -0.97978200 |
| C | 3.66957500  | -1.55200800 | -1.16872900 |
| C | 2.47912600  | -1.34998800 | -0.47416700 |
| H | 1.35118900  | 0.57153300  | 2.14875200  |
| H | -0.58046800 | 1.82838800  | 0.80186200  |
| H | -0.49502200 | -0.14121100 | -1.56971500 |
| H | -1.49108700 | -0.02676500 | 2.35131100  |
| H | -1.28231400 | -1.77030500 | 2.63920200  |
| H | -0.20802600 | -0.60677800 | 3.46456000  |
| H | -2.40208900 | -1.77655200 | -1.59670300 |
| H | -4.85969300 | -2.03446900 | -1.51094200 |
| H | -6.25588600 | -0.32056300 | -0.36367400 |
| H | -5.16152000 | 1.66473200  | 0.66333200  |

|   |             |             |             |
|---|-------------|-------------|-------------|
| H | -2.71848100 | 1.94047000  | 0.53961800  |
| H | 1.21924600  | 1.44006300  | -1.69202900 |
| H | 3.39762600  | 1.38913300  | 1.33143800  |
| H | 5.49434800  | 1.03502200  | 0.07637200  |
| H | 5.68077100  | -0.85610900 | -1.53275400 |
| H | 3.74494500  | -2.38112400 | -1.86737900 |
| H | 1.63063600  | -2.00509000 | -0.62840500 |

**TS-a-on: E= -863.1166293 a.u**

1 imaginary frequency = -426.7556 cm<sup>-1</sup>

|   |             |             |             |
|---|-------------|-------------|-------------|
| N | 2.04284600  | 1.21230900  | 0.87262100  |
| C | 0.74689300  | 0.87596900  | 1.13300300  |
| C | 0.92574500  | -1.08853500 | 0.29819700  |
| C | 1.79765200  | -0.81087300 | -0.78295300 |
| O | 2.42403500  | 1.08186000  | -0.36903600 |
| C | 3.08198700  | 0.95385800  | 1.87121400  |
| C | 3.16852100  | -1.34634200 | -0.79102600 |
| O | 3.84668700  | -1.49861100 | -1.78983800 |
| C | -0.47043200 | -1.55956500 | 0.12977300  |
| C | -1.07018000 | -2.28286500 | 1.17568600  |
| C | -2.37380800 | -2.76472600 | 1.06864000  |
| C | -3.11262200 | -2.53234900 | -0.09235500 |
| C | -2.53192100 | -1.81301600 | -1.13913900 |
| C | -1.22875200 | -1.33195200 | -1.03136800 |
| C | -0.38416700 | 1.51399200  | 0.42592300  |
| C | -1.64204200 | 1.47949300  | 1.05196400  |
| C | -2.75048400 | 2.08671800  | 0.46649700  |
| C | -2.61903500 | 2.75090200  | -0.75361700 |
| C | -1.37260000 | 2.79519000  | -1.38289600 |
| C | -0.26377000 | 2.17546700  | -0.80955000 |
| H | 0.55916200  | 0.70449100  | 2.19155200  |
| H | 1.41557500  | -1.54574400 | 1.16117500  |
| H | 1.39778800  | -0.60675300 | -1.77103400 |
| H | 3.34421600  | -0.11223700 | 1.88814300  |
| H | 2.73588900  | 1.26982400  | 2.85780800  |
| H | 3.96308000  | 1.52954500  | 1.58559100  |
| H | 3.55288300  | -1.65181800 | 0.21066900  |
| H | -0.49878500 | -2.47786500 | 2.08124100  |
| H | -2.80906600 | -3.32716900 | 1.89072900  |
| H | -4.12769000 | -2.90937000 | -0.18228300 |
| H | -3.09619600 | -1.62559400 | -2.04891300 |
| H | -0.80212300 | -0.77187000 | -1.85723000 |
| H | -1.75081300 | 0.96887200  | 2.00547300  |
| H | -3.71407200 | 2.04501000  | 0.96678600  |

|   |             |            |             |
|---|-------------|------------|-------------|
| H | -3.48039600 | 3.22997000 | -1.21124400 |
| H | -1.26133100 | 3.31340100 | -2.33175000 |
| H | 0.70026100  | 2.20697000 | -1.30202800 |

**TS-a-ox: E=** -863.1173735 a.u

1 imaginary frequency = -453.1574 cm<sup>-1</sup>

|   |             |             |             |
|---|-------------|-------------|-------------|
| N | -0.39423700 | 0.99180200  | 1.69886700  |
| C | -0.49211300 | -0.20585500 | 1.04653600  |
| C | 0.58006700  | 0.35817100  | -0.64945100 |
| C | 0.36841000  | 1.76180200  | -0.66670700 |
| O | -0.75557700 | 2.03730200  | 1.00520600  |
| C | -0.64046100 | 2.33426100  | -1.57543100 |
| O | -0.65293900 | 3.49368500  | -1.94313100 |
| C | 1.92318600  | -0.26786300 | -0.49147700 |
| C | 2.06732700  | -1.63819600 | -0.77660300 |
| C | 3.29588700  | -2.28240200 | -0.64471000 |
| C | 4.42099000  | -1.57001600 | -0.22549200 |
| C | 4.29992100  | -0.20679100 | 0.04970600  |
| C | 3.06954500  | 0.43606300  | -0.08392600 |
| C | -1.78354400 | -0.69572000 | 0.50184600  |
| C | -1.89798000 | -2.07383700 | 0.24769500  |
| C | -3.07953700 | -2.61414300 | -0.25562900 |
| C | -4.17634100 | -1.78634800 | -0.50188600 |
| C | -4.07715700 | -0.41805400 | -0.24093600 |
| C | -2.89194100 | 0.13025700  | 0.24806900  |
| C | 0.71508200  | 1.23172100  | 2.62695000  |
| H | 0.10233900  | -0.98768600 | 1.51490900  |
| H | -0.06166600 | -0.19666400 | -1.33262600 |
| H | 1.15661600  | 2.45257300  | -0.38566300 |
| H | -1.41692700 | 1.61421900  | -1.91672400 |
| H | 1.19981900  | -2.20141600 | -1.11429800 |
| H | 3.37541600  | -3.34147500 | -0.87620100 |
| H | 5.38122400  | -2.06793100 | -0.12411800 |
| H | 5.17016400  | 0.36499800  | 0.36152300  |
| H | 3.01221600  | 1.50293700  | 0.11215900  |
| H | -1.05385900 | -2.72798700 | 0.45551500  |
| H | -3.14609200 | -3.68217700 | -0.44475700 |
| H | -5.10084900 | -2.20423200 | -0.89070600 |
| H | -4.92816700 | 0.23272000  | -0.42323600 |
| H | -2.81880100 | 1.19278300  | 0.44482100  |
| H | 0.43719700  | 2.07642100  | 3.25917200  |
| H | 1.62942500  | 1.47742300  | 2.07562300  |
| H | 0.88169700  | 0.34668700  | 3.24461500  |



**CA-a-mn:** E= -863.164208 a.u

|   |             |             |             |
|---|-------------|-------------|-------------|
| N | -0.73902200 | -1.33025200 | 1.60285400  |
| C | -1.24888900 | -1.18743900 | 0.21290900  |
| C | 0.08709400  | -1.10784100 | -0.59868700 |
| C | 1.16455800  | -0.90885900 | 0.52230300  |
| O | 0.40786000  | -0.42961300 | 1.63628800  |
| C | -1.61841600 | -0.95362500 | 2.69666700  |
| C | 0.33537100  | -2.37718700 | -1.38268500 |
| O | 0.56587900  | -2.42474100 | -2.56958000 |
| C | -2.20413700 | -0.04247100 | -0.08656400 |
| C | -3.42038500 | -0.31425800 | -0.72522800 |
| C | -4.31810500 | 0.71068200  | -1.02964600 |
| C | -4.01724400 | 2.02778700  | -0.68284000 |
| C | -2.81414900 | 2.31084000  | -0.03196600 |
| C | -1.91265700 | 1.28737900  | 0.25995100  |
| C | 2.29206700  | 0.04274100  | 0.20465600  |
| C | 3.61459500  | -0.40785800 | 0.27452900  |
| C | 4.67779700  | 0.44912700  | -0.01545100 |
| C | 4.42758000  | 1.77420400  | -0.37048300 |
| C | 3.11042100  | 2.23567400  | -0.43777100 |
| C | 2.05078000  | 1.37569000  | -0.15574500 |
| H | -1.77469400 | -2.12661200 | -0.00510900 |
| H | 0.07712000  | -0.26958500 | -1.29705700 |
| H | 1.57989800  | -1.89178900 | 0.78822500  |
| H | -1.09053300 | -1.13807400 | 3.63587400  |
| H | -1.95179100 | 0.09245600  | 2.66593100  |
| H | -2.49596600 | -1.60682700 | 2.65341700  |
| H | 0.28893800  | -3.30802500 | -0.76976100 |
| H | -3.66519100 | -1.33952400 | -0.99529800 |
| H | -5.25224000 | 0.47779500  | -1.53391200 |
| H | -4.71485400 | 2.82786200  | -0.91514800 |
| H | -2.57497300 | 3.33318900  | 0.24911900  |
| H | -0.98484500 | 1.51116500  | 0.77590700  |
| H | 3.81446800  | -1.43820000 | 0.55906900  |
| H | 5.69866200  | 0.08102500  | 0.03983000  |
| H | 5.25254500  | 2.44496900  | -0.59494300 |
| H | 2.90834400  | 3.26705700  | -0.71416800 |
| H | 1.03065600  | 1.74221000  | -0.21930100 |

**CA-a-mx:** E= -863.1624402 a.u

|   |             |             |             |
|---|-------------|-------------|-------------|
| N | -0.20505600 | -1.61661100 | -0.55822300 |
| C | -0.94787000 | -0.39383200 | -0.94013300 |
| C | 0.16357900  | 0.66346800  | -0.66507100 |
| C | 0.93042100  | 0.05232000  | 0.55489300  |
| O | 0.37197500  | -1.25462400 | 0.74223200  |

|   |             |             |             |
|---|-------------|-------------|-------------|
| C | -0.97897400 | -2.82853800 | -0.33344400 |
| C | 2.43544400  | 0.03171100  | 0.37365700  |
| C | 3.23023700  | 0.98801600  | 1.01273200  |
| C | 4.61526700  | 0.99654600  | 0.83315700  |
| C | 5.21811100  | 0.03782100  | 0.01924600  |
| C | 4.42969600  | -0.92656500 | -0.61496200 |
| C | 3.04668900  | -0.92981600 | -0.44225700 |
| C | -0.34436700 | 2.06871600  | -0.40684500 |
| O | -0.15513900 | 2.99982000  | -1.15721700 |
| C | -2.29734400 | -0.13929200 | -0.27692600 |
| C | -3.39818600 | 0.15675500  | -1.09243800 |
| C | -4.65565600 | 0.41339200  | -0.54377100 |
| C | -4.83597100 | 0.36585000  | 0.83838200  |
| C | -3.75109800 | 0.06112300  | 1.66327500  |
| C | -2.49218600 | -0.18524300 | 1.11463100  |
| H | -1.10986000 | -0.45687500 | -2.02139300 |
| H | 0.82312000  | 0.70899900  | -1.53415700 |
| H | 0.69046600  | 0.60827100  | 1.47132700  |
| H | -1.44652400 | -3.10069400 | -1.28511500 |
| H | -0.28794800 | -3.62411900 | -0.04331000 |
| H | -1.75670600 | -2.72518300 | 0.43490000  |
| H | 2.76620900  | 1.73084800  | 1.65883600  |
| H | 5.22048500  | 1.74650900  | 1.33551900  |
| H | 6.29612100  | 0.03834400  | -0.11832900 |
| H | 4.89519700  | -1.67894500 | -1.24647300 |
| H | 2.42878800  | -1.67479500 | -0.93448900 |
| H | -0.90888400 | 2.20470000  | 0.54050700  |
| H | -3.26840000 | 0.19289900  | -2.17212500 |
| H | -5.49199100 | 0.64689100  | -1.19722800 |
| H | -5.81341700 | 0.56281400  | 1.27027200  |
| H | -3.88323500 | 0.01603200  | 2.74116400  |
| H | -1.65947300 | -0.43558600 | 1.76277300  |

**CA-a-on:** E= -863.1599374 a.u

|   |             |             |             |
|---|-------------|-------------|-------------|
| N | 0.84469600  | 2.24828700  | -0.74408500 |
| C | 0.67848300  | 0.79051600  | -0.97464700 |
| C | -0.84521500 | 0.67685600  | -0.65989600 |
| C | -1.00919400 | 1.72608100  | 0.48981600  |
| O | 0.22622100  | 2.42644300  | 0.57712900  |
| C | 2.20322900  | 2.75231400  | -0.60950900 |
| C | -2.13514100 | 2.70944700  | 0.20748900  |
| O | -3.27785700 | 2.55822900  | 0.58083700  |
| C | -1.45741500 | -0.69067200 | -0.40350000 |
| C | -0.95750200 | -1.83815400 | -1.03598900 |
| C | -1.56476100 | -3.08031100 | -0.85220500 |
| C | -2.69188500 | -3.19931700 | -0.03827300 |

|   |             |             |             |
|---|-------------|-------------|-------------|
| C | -3.21035400 | -2.06231700 | 0.58076500  |
| C | -2.60173600 | -0.81933200 | 0.39817000  |
| C | 1.63481500  | -0.12315100 | -0.22370200 |
| C | 2.60823000  | -0.81839900 | -0.95592200 |
| C | 3.53829800  | -1.64565600 | -0.32527700 |
| C | 3.51468500  | -1.78677900 | 1.06207400  |
| C | 2.55732900  | -1.09477200 | 1.80635800  |
| C | 1.62583000  | -0.27232200 | 1.17246400  |
| H | 0.83726600  | 0.64171700  | -2.04845200 |
| H | -1.34100100 | 1.09453900  | -1.54758800 |
| H | -1.18558200 | 1.24651000  | 1.45762600  |
| H | 2.71239300  | 2.59313800  | -1.56526100 |
| H | 2.77414200  | 2.26658900  | 0.19289600  |
| H | 2.14861500  | 3.82706600  | -0.41725100 |
| H | -1.81732900 | 3.59831400  | -0.37914300 |
| H | -0.07963600 | -1.77013900 | -1.67042000 |
| H | -1.15203800 | -3.95647700 | -1.34551000 |
| H | -3.16385000 | -4.16736700 | 0.10689200  |
| H | -4.09572700 | -2.13637900 | 1.20675400  |
| H | -3.04210700 | 0.05871700  | 0.86215500  |
| H | 2.63610300  | -0.71293100 | -2.03909500 |
| H | 4.27857200  | -2.17686900 | -0.91775900 |
| H | 4.23479800  | -2.43041800 | 1.56004600  |
| H | 2.53157600  | -1.19692800 | 2.88805200  |
| H | 0.89783600  | 0.26133600  | 1.77163600  |

**CA-a-ox:** E= -863.1633643 a.u

|   |             |             |             |
|---|-------------|-------------|-------------|
| N | -0.59067300 | 1.03705200  | 1.67135500  |
| C | -0.54360500 | -0.14768200 | 0.77187400  |
| C | 0.55833200  | 0.27858800  | -0.25944400 |
| C | 0.67135600  | 1.82746200  | 0.00470100  |
| O | -0.49074100 | 2.16354600  | 0.74108000  |
| C | 0.67067200  | 2.61597400  | -1.28911700 |
| O | 1.67706900  | 2.92197600  | -1.88584100 |
| C | 1.88023500  | -0.44731800 | -0.12692900 |
| C | 2.46147200  | -1.07122900 | -1.23629800 |
| C | 3.68127700  | -1.74143300 | -1.12265200 |
| C | 4.33630900  | -1.79784400 | 0.10719800  |
| C | 3.76553100  | -1.17807500 | 1.22202800  |
| C | 2.54938900  | -0.50723700 | 1.10576400  |
| C | -1.84865000 | -0.59139000 | 0.12971700  |
| C | -2.31395000 | -1.89301300 | 0.35756400  |
| C | -3.50155900 | -2.34591100 | -0.21991600 |
| C | -4.25247000 | -1.49416300 | -1.02992100 |
| C | -3.80629500 | -0.19013000 | -1.25754800 |
| C | -2.61467600 | 0.25697200  | -0.68740200 |

|   |             |             |             |
|---|-------------|-------------|-------------|
| C | -1.79895400 | 1.24900900  | 2.45219100  |
| H | -0.16804400 | -0.97322100 | 1.38427300  |
| H | 0.16840800  | 0.10746800  | -1.26782000 |
| H | 1.58216900  | 2.04549900  | 0.57416900  |
| H | -0.34198800 | 2.86422700  | -1.67826300 |
| H | 1.95665900  | -1.03092300 | -2.19877400 |
| H | 4.11719800  | -2.21866900 | -1.99631600 |
| H | 5.28556500  | -2.31892500 | 0.19794500  |
| H | 4.27010400  | -1.21550400 | 2.18398700  |
| H | 2.11034400  | -0.02247500 | 1.97484100  |
| H | -1.73521000 | -2.56324300 | 0.98986300  |
| H | -3.83858600 | -3.36245500 | -0.03469600 |
| H | -5.17838200 | -1.84171300 | -1.48016000 |
| H | -4.38754000 | 0.48230900  | -1.88318400 |
| H | -2.28193600 | 1.27510700  | -0.86141000 |
| H | -1.66345900 | 2.15409500  | 3.04987000  |
| H | -1.90829600 | 0.39492800  | 3.12797300  |
| H | -2.70940700 | 1.34447000  | 1.84544200  |

**Alkene 2d: E=-269.349344 a.u**

|   |             |             |             |
|---|-------------|-------------|-------------|
| C | 0.00000000  | 0.00000000  | 0.00000000  |
| C | 0.00000000  | 0.00000000  | 1.53938792  |
| C | 1.41933872  | 0.00000000  | 1.97335530  |
| C | 2.23262661  | -0.00040235 | 0.90760210  |
| C | 1.48938750  | -0.00083924 | -0.40881785 |
| H | -0.54180328 | 0.87858473  | -0.36446269 |
| H | 1.70309542  | 0.00029111  | 3.01999146  |
| H | 3.31858680  | -0.00047379 | 0.94798635  |
| H | 1.76055984  | -0.87769413 | -1.01098758 |
| H | 1.76138098  | 0.87486454  | -1.01227242 |
| H | -0.54306626 | -0.87771916 | -0.36462301 |
| O | -0.98291475 | 0.00017409  | 2.25676869  |

**TS-d-mn: E= -709.496283 a.u**

1 imaginary frequency = -404.7805 cm<sup>-1</sup>

|   |             |             |             |
|---|-------------|-------------|-------------|
| O | 1.88133100  | -1.92041300 | -0.11493200 |
| C | -0.15543900 | -1.07168100 | -0.50265400 |
| H | -0.04634300 | -1.51042700 | -1.48722600 |
| N | 0.68329700  | -1.63113800 | 0.38486500  |
| C | -1.46737600 | -0.47863400 | -0.20179500 |
| C | -2.55420600 | -0.85867000 | -1.01146500 |
| C | -1.68281600 | 0.48051200  | 0.80401800  |
| C | -3.82432100 | -0.33096300 | -0.79763500 |

|   |             |             |             |
|---|-------------|-------------|-------------|
| H | -2.39659600 | -1.58224300 | -1.80752800 |
| C | -2.95482200 | 1.00909400  | 1.01410600  |
| H | -0.85207700 | 0.85016500  | 1.39273900  |
| C | -4.02923700 | 0.60168400  | 0.22167200  |
| H | -4.65243200 | -0.64419400 | -1.42731300 |
| H | -3.10142700 | 1.75693200  | 1.78814700  |
| H | -5.01821000 | 1.01999700  | 0.38743400  |
| C | 1.42158900  | 0.41059800  | -1.24367300 |
| C | 2.53251700  | -0.41823400 | -0.93040000 |
| C | 0.63961000  | -1.43466800 | 1.83113700  |
| H | -0.39410300 | -1.48614200 | 2.17711900  |
| H | 1.22243600  | -2.24277400 | 2.27566700  |
| H | 1.07750900  | -0.47429500 | 2.12194400  |
| C | 3.41967400  | 0.27735800  | 0.10286400  |
| C | 1.40221800  | 1.58779500  | -0.37425100 |
| C | 2.59210500  | 1.47539500  | 0.60752400  |
| H | 2.22518500  | 1.35163800  | 1.63323900  |
| H | 3.14925300  | 2.41780600  | 0.59654200  |
| H | 0.93000200  | 0.44118400  | -2.20896300 |
| H | 3.02526500  | -1.01157800 | -1.69440300 |
| H | 3.73786000  | -0.40933200 | 0.89271500  |
| H | 4.33235300  | 0.62538700  | -0.39812500 |
| O | 0.61132800  | 2.52270500  | -0.39166000 |

**TS-d-mx:** E= -709.500402 a.u

1 imaginary frequency = -390.0699 cm<sup>-1</sup>

|   |             |             |             |
|---|-------------|-------------|-------------|
| O | -1.85078700 | 1.66313300  | -0.73169100 |
| C | 0.03549100  | 0.46230200  | -0.62198700 |
| H | -0.44234100 | -0.19248100 | -1.33974000 |
| N | -0.53620300 | 1.68023800  | -0.60216700 |
| C | 1.43765400  | 0.14583600  | -0.30967700 |
| C | 2.09035800  | -0.78330500 | -1.14046600 |
| C | 2.14015900  | 0.65740400  | 0.79757400  |
| C | 3.40961700  | -1.15832700 | -0.90015700 |
| H | 1.55283100  | -1.21076400 | -1.98242900 |
| C | 3.45978900  | 0.28141400  | 1.03666700  |
| H | 1.64706900  | 1.32491100  | 1.49563400  |
| C | 4.10196500  | -0.62136600 | 0.18625300  |
| H | 3.89442800  | -1.87402900 | -1.55799700 |
| H | 3.98376500  | 0.68388500  | 1.89920900  |
| H | 5.13001300  | -0.91523300 | 0.37876000  |
| C | -1.39496100 | -0.30546400 | 0.98556800  |
| C | -1.63628700 | -1.65033100 | 0.44622000  |
| C | -2.89485200 | -1.56551600 | -0.44232300 |

|   |             |             |             |
|---|-------------|-------------|-------------|
| C | -3.55884800 | -0.22682800 | -0.07029300 |
| C | -2.47296400 | 0.54617700  | 0.66233400  |
| H | -0.70517200 | -0.14988700 | 1.80762800  |
| H | -2.58692500 | -1.59106200 | -1.49618300 |
| H | -3.52961200 | -2.44103100 | -0.27767400 |
| H | -2.76100900 | 1.37677000  | 1.29940100  |
| C | -0.01721700 | 2.85120800  | 0.09776900  |
| H | 1.05796100  | 2.94369100  | -0.06253400 |
| H | -0.53312200 | 3.71799400  | -0.31690500 |
| H | -0.23200800 | 2.78984600  | 1.17320500  |
| H | -4.40869200 | -0.38601700 | 0.60610400  |
| H | -3.93177100 | 0.33285500  | -0.93381500 |
| O | -0.97188900 | -2.65942400 | 0.62639300  |

**TS-d-on: E= -709.488685 a.u**

1 imaginary frequency = -429.2008 cm<sup>-1</sup>

|   |             |             |             |
|---|-------------|-------------|-------------|
| O | 1.67388700  | -1.86508000 | -0.05185700 |
| C | -0.28358700 | -0.88651600 | -0.48566000 |
| H | -0.22998600 | -1.42067900 | -1.42942500 |
| N | 0.52350200  | -1.51146600 | 0.42922400  |
| C | -1.63462800 | -0.35004300 | -0.19350100 |
| C | -2.64464200 | -0.60330700 | -1.14064300 |
| C | -1.96373700 | 0.44551300  | 0.92016700  |
| C | -3.93405000 | -0.10404100 | -0.97620700 |
| H | -2.41083500 | -1.20692400 | -2.01424900 |
| C | -3.25686300 | 0.94165400  | 1.08721400  |
| H | -1.21270800 | 0.69174000  | 1.66174800  |
| C | -4.24745400 | 0.66892800  | 0.14351200  |
| H | -4.69478000 | -0.32176400 | -1.72082100 |
| H | -3.48628400 | 1.55087600  | 1.95722900  |
| H | -5.25257600 | 1.05907300  | 0.27658700  |
| C | 1.01869700  | 0.53622500  | -1.17492700 |
| C | 2.24738300  | -0.15321200 | -1.11357700 |
| C | 3.16403200  | 0.50640400  | -0.15916600 |
| C | 1.07746800  | 1.78209900  | -0.28042200 |
| H | 1.13206300  | 2.67403300  | -0.91760800 |
| C | 2.37476400  | 1.63188000  | 0.54027800  |
| O | 4.34571400  | 0.26635200  | 0.01370700  |
| H | 0.18154300  | 1.91005900  | 0.33598600  |
| H | 2.98323900  | 2.54136300  | 0.55698500  |
| H | 2.19824200  | 1.36056300  | 1.58750800  |
| H | 2.63870900  | -0.80817200 | -1.88021000 |
| H | 0.48601500  | 0.62778300  | -2.11825600 |
| C | 0.48177900  | -1.31895900 | 1.88036700  |
| H | -0.54660900 | -1.39068800 | 2.23752800  |

|   |            |             |            |
|---|------------|-------------|------------|
| H | 1.08242600 | -2.12058400 | 2.31037500 |
| H | 0.91524500 | -0.35633800 | 2.17263700 |

**TS-d-ox:** E= -709.493491 a.u

1 imaginary frequency = -409.6217cm<sup>-1</sup>

|   |             |             |             |
|---|-------------|-------------|-------------|
| O | -1.65066900 | 1.49562900  | -0.92085700 |
| C | 0.16146100  | 0.24600200  | -0.54809600 |
| H | -0.26480800 | -0.43143300 | -1.28235200 |
| N | -0.37955600 | 1.48993300  | -0.69652600 |
| C | 1.59418400  | -0.00451000 | -0.24957900 |
| C | 2.31663100  | -0.84445000 | -1.11462600 |
| C | 2.24942700  | 0.49837900  | 0.88839500  |
| C | 3.65491800  | -1.14829600 | -0.87031700 |
| H | 1.82252600  | -1.25275400 | -1.99268200 |
| C | 3.58871300  | 0.19756800  | 1.13161400  |
| H | 1.70714500  | 1.11374000  | 1.59967900  |
| C | 4.29728300  | -0.62374200 | 0.25230700  |
| H | 4.19506400  | -1.79416000 | -1.55704400 |
| H | 4.07643900  | 0.59685400  | 2.01668700  |
| H | 5.33986900  | -0.85988900 | 0.44615400  |
| C | -1.06234100 | -0.44778700 | 0.95502700  |
| C | -1.35535300 | -1.89089400 | 0.52461600  |
| C | -2.64542100 | -1.77292300 | -0.30987000 |
| C | -3.28974400 | -0.45817600 | 0.15886200  |
| C | -2.22608900 | 0.32483900  | 0.81958100  |
| H | -0.36574700 | -0.27807000 | 1.77271200  |
| H | -1.52878300 | -2.51057800 | 1.41378100  |
| H | -0.52283500 | -2.35309400 | -0.01940800 |
| H | -2.42827500 | -1.67883500 | -1.38254800 |
| H | -3.33824900 | -2.61033100 | -0.19152200 |
| H | -2.45855000 | 1.23070900  | 1.36495400  |
| O | -4.46031000 | -0.15009100 | 0.02853500  |
| C | 0.14151100  | 2.69626900  | -0.05146200 |
| H | 1.22808700  | 2.73796700  | -0.13647300 |
| H | -0.31312300 | 3.54532200  | -0.56220900 |
| H | -0.15511000 | 2.71703700  | 1.00582400  |

**CA-d-mn:** E= -709.549365 a.u

|   |             |            |             |
|---|-------------|------------|-------------|
| O | -2.23561000 | 1.49866100 | -0.08691800 |
| C | -0.15337000 | 0.73714400 | -0.64167900 |
| H | -0.10762200 | 1.41925900 | -1.50926400 |
| N | -0.88239500 | 1.38295900 | 0.46474500  |
| C | 1.25652800  | 0.33302100 | -0.26543100 |
| C | 2.26105900  | 0.36601000 | -1.24042900 |

|   |             |             |             |
|---|-------------|-------------|-------------|
| C | 1.59025700  | -0.07736200 | 1.03222800  |
| C | 3.56669700  | -0.01717900 | -0.93462300 |
| H | 2.01746000  | 0.69349300  | -2.24890700 |
| C | 2.89819900  | -0.44972600 | 1.34255100  |
| H | 0.82283300  | -0.09137100 | 1.79959000  |
| C | 3.88938500  | -0.42592300 | 0.36023300  |
| H | 4.33182800  | 0.00985700  | -1.70596500 |
| H | 3.14149100  | -0.76311200 | 2.35434000  |
| H | 4.90687900  | -0.72066000 | 0.60270300  |
| C | -1.14551600 | -0.40201200 | -1.02446000 |
| C | -2.51977200 | 0.23508400  | -0.69862700 |
| C | -0.47350900 | 2.75681800  | 0.72104800  |
| H | 0.55305100  | 2.73992700  | 1.09615000  |
| H | -0.52650800 | 3.38307100  | -0.18400800 |
| H | -1.12626900 | 3.18073500  | 1.48814400  |
| C | -3.25523200 | -0.74781800 | 0.24670000  |
| C | -1.05301000 | -1.65416900 | -0.13469000 |
| C | -2.16216500 | -1.59657100 | 0.91185800  |
| H | -1.75538900 | -1.07993600 | 1.79212200  |
| H | -2.46912900 | -2.60038800 | 1.21800500  |
| H | -1.00733500 | -0.69125200 | -2.06941900 |
| H | -3.12164000 | 0.46857100  | -1.58115700 |
| H | -3.87768700 | -0.19371900 | 0.95497500  |
| H | -3.91717100 | -1.38823400 | -0.34966600 |
| O | -0.25005600 | -2.54751800 | -0.28294800 |

**CA-b-mx:** E= -709.552707 a.u

|   |             |             |             |
|---|-------------|-------------|-------------|
| O | -1.85829500 | 1.61434200  | -0.08471600 |
| C | -0.04242200 | 0.24091300  | -0.36147000 |
| H | -0.28265000 | -0.07893800 | -1.39022500 |
| N | -0.40177600 | 1.66657200  | -0.17526600 |
| C | 1.42864600  | -0.00285900 | -0.10600800 |
| C | 2.16698900  | -0.82581200 | -0.96389200 |
| C | 2.07121500  | 0.58067800  | 0.99466100  |
| C | 3.52101000  | -1.06924900 | -0.72566400 |
| H | 1.67754500  | -1.28349400 | -1.81984400 |
| C | 3.42440300  | 0.34233700  | 1.23014700  |
| H | 1.50489400  | 1.23656700  | 1.64943900  |
| C | 4.15315200  | -0.48529200 | 0.37186600  |
| H | 4.08081600  | -1.71210100 | -1.39982300 |
| H | 3.91118200  | 0.80434800  | 2.08496100  |
| H | 5.20771400  | -0.67101900 | 0.55767400  |
| C | -1.02670900 | -0.46210000 | 0.62661500  |
| C | -1.80536700 | -1.59505700 | -0.05872000 |
| C | -3.23153100 | -1.10583200 | -0.33810100 |



|   |             |             |             |
|---|-------------|-------------|-------------|
| C | -3.46246300 | -0.00376800 | 0.70962300  |
| C | -2.07788500 | 0.63176900  | 0.93014000  |
| H | -0.50335700 | -0.84325300 | 1.50627700  |
| H | -3.23296400 | -0.67924600 | -1.35244100 |
| H | -3.95104400 | -1.92995600 | -0.32083000 |
| H | -1.96078400 | 1.08279400  | 1.92417200  |
| C | -0.10412600 | 2.50310100  | -1.32979700 |
| H | 0.98324300  | 2.53220100  | -1.44657600 |
| H | -0.56286800 | 2.12387100  | -2.25887700 |
| H | -0.46694400 | 3.51581900  | -1.13673400 |
| H | -3.80727900 | -0.44304100 | 1.65535400  |
| H | -4.19934800 | 0.74617700  | 0.40709300  |
| O | -1.35110500 | -2.68430500 | -0.32892800 |

**CA-d-on:** E= -709.543075 a.u

|   |             |             |             |
|---|-------------|-------------|-------------|
| O | -1.93900200 | 1.50449900  | -0.28562500 |
| C | 0.12581800  | 0.61712400  | -0.71109700 |
| H | 0.23098100  | 1.23308200  | -1.62235500 |
| N | -0.60805100 | 1.37542000  | 0.32038700  |
| C | 1.50449300  | 0.18208900  | -0.25888000 |
| C | 2.50052100  | -0.03575800 | -1.22058700 |
| C | 1.81789800  | -0.02775100 | 1.09160500  |
| C | 3.77266000  | -0.46917600 | -0.84817500 |
| H | 2.27651200  | 0.13874900  | -2.27094100 |
| C | 3.09395100  | -0.45271700 | 1.46631300  |
| H | 1.05951400  | 0.15909800  | 1.84537300  |
| C | 4.07367500  | -0.67972300 | 0.49899700  |
| H | 4.53072300  | -0.63424300 | -1.60931200 |
| H | 3.32124400  | -0.60513100 | 2.51820500  |
| H | 5.06619900  | -1.01115500 | 0.79211100  |
| C | -0.88811000 | -0.51455500 | -1.03650200 |
| C | -2.23687200 | 0.20454100  | -0.76946900 |
| C | -2.99434300 | -0.69165200 | 0.24172500  |
| C | -0.86797200 | -1.76256000 | -0.10762900 |
| H | -0.34620300 | -2.60559400 | -0.56879500 |
| C | -2.34287300 | -2.06918200 | 0.21086100  |
| O | -3.92038100 | -0.33214300 | 0.92904400  |
| H | -0.34198200 | -1.53002200 | 0.82224300  |
| H | -2.80775100 | -2.64647400 | -0.60322000 |
| H | -2.51259900 | -2.61525800 | 1.14237500  |
| H | -2.86218700 | 0.34037000  | -1.65985300 |
| H | -0.78591700 | -0.81681300 | -2.08270800 |
| C | -0.15581700 | 2.74957200  | 0.48815800  |
| H | 0.85598300  | 2.72640600  | 0.90133500  |
| H | -0.15268700 | 3.30609900  | -0.46273100 |

H -0.81859200 3.25259900 1.19629100

**CA-d-ox:** E= -709.545595 a.u

O 0.00000000 0.00000000 0.00000000  
C 0.00000000 0.00000000 2.28179711  
H 1.10392393 0.00000000 2.34206604  
N -0.43920752 0.81821173 1.13713012  
C -0.57062107 0.49112206 3.59360594  
C 0.24054207 0.57604145 4.73083832  
C -1.92362273 0.84691051 3.69944018  
C -0.28740438 0.99341935 5.95466710  
H 1.29452626 0.31690877 4.65752156  
C -2.44972310 1.27202412 4.91832015  
H -2.55074035 0.80390266 2.81393343  
C -1.63425079 1.34269612 6.05124973  
H 0.35619351 1.05171117 6.82845552  
H -3.49823729 1.55036589 4.98472498  
H -2.04603098 1.67315757 7.00109590  
C -0.47027770 -1.41699554 1.85513514  
C 0.51697719 -2.55801987 2.21914831  
C 1.46896833 -2.68159807 1.01506174  
C 0.59877720 -2.30244320 -0.18131007  
C -0.47733366 -1.31111021 0.31094446  
H -1.46855973 -1.60711425 2.25636353  
H -0.03519616 -3.49581758 2.34881337  
H 1.03761465 -2.36235498 3.16225609  
H 2.28438048 -1.94734414 1.07800082  
H 1.92072624 -3.66767753 0.88145809  
H -1.45161095 -1.49643631 -0.15705072  
O 0.69742908 -2.71403622 -1.31338935  
C 0.27862923 2.07572641 0.99166088  
H 0.02020822 2.70829929 1.84528222  
H 1.37122381 1.93495180 0.95440153  
H -0.05118708 2.56638162 0.07272584

**Alkene 2e:** E=-403.1289297 a.u

C 0.15128800 -0.33275200 0.00016700  
C -0.38888000 0.98533700 0.00010100  
C -1.78547600 1.14370400 0.00028000  
C -2.59440900 0.01426000 0.00021100  
C -2.03752600 -1.28123500 -0.00019300  
C -0.66030900 -1.47325400 -0.00034800  
C 1.86076400 1.12086400 -0.00028800  
C 0.72675800 1.88883900 -0.00032300

|   |             |             |             |
|---|-------------|-------------|-------------|
| H | -2.22506700 | 2.13806800  | 0.00041500  |
| H | -3.67528300 | 0.12706900  | 0.00034200  |
| H | -2.69644400 | -2.14538400 | -0.00046700 |
| H | -0.23486700 | -2.47306700 | -0.00098200 |
| H | 2.90172300  | 1.41610200  | 0.00002800  |
| H | 0.69046800  | 2.96962400  | -0.00047600 |
| N | 1.52981300  | -0.22415600 | 0.00008400  |
| C | 2.46029300  | -1.33291000 | 0.00030600  |
| H | 2.32794300  | -1.95906000 | 0.89093000  |
| H | 2.32773100  | -1.95958000 | -0.88991900 |
| H | 3.48008800  | -0.94179300 | 0.00006400  |

**TS-e-mn: E= -843.2576736 a.u**

1 imaginary frequency = -457.9068 cm<sup>-1</sup>

|   |             |             |             |
|---|-------------|-------------|-------------|
| C | -1.93993900 | -0.88063300 | -0.27505700 |
| C | -1.45473700 | 1.16477100  | -1.23695000 |
| C | -0.32378100 | 0.29244700  | -1.38988900 |
| C | 1.12386000  | 1.29593500  | -0.36071200 |
| O | -0.64818800 | 2.58212600  | 0.06252700  |
| N | 0.35433000  | 1.92647100  | 0.58285200  |
| C | 0.13824100  | 1.44854000  | 1.95102300  |
| H | 1.09198500  | 1.18720100  | 2.41345800  |
| H | -0.31953500 | 2.27671100  | 2.49378500  |
| H | -0.54070000 | 0.58961100  | 1.97726200  |
| C | 2.29007000  | 0.44010100  | -0.02811200 |
| C | 3.50590200  | 0.68515400  | -0.69158100 |
| C | 2.23307900  | -0.64539600 | 0.86568200  |
| C | 4.62998100  | -0.10391400 | -0.45547100 |
| H | 3.56778800  | 1.51344300  | -1.39346400 |
| C | 3.35958400  | -1.43226400 | 1.10557900  |
| H | 1.29830900  | -0.89168800 | 1.35593900  |
| C | 4.56283200  | -1.16429600 | 0.45034000  |
| H | 5.55940800  | 0.11247800  | -0.97549100 |
| H | 3.29321400  | -2.26398400 | 1.80219500  |
| H | 5.43820800  | -1.77957900 | 0.63957100  |
| H | 1.30699900  | 1.97645600  | -1.18933500 |
| H | 0.23960000  | 0.23226600  | -2.31674300 |
| H | -1.66028300 | 2.00530800  | -1.88262900 |
| C | -2.46813400 | 0.41352000  | -0.53235400 |
| N | -0.65483700 | -0.95939300 | -0.78966400 |
| C | -3.76540700 | 0.72764400  | -0.10902800 |
| C | -2.68651300 | -1.84985100 | 0.40277000  |
| H | -4.17578800 | 1.71617900  | -0.29792100 |
| H | -2.28728000 | -2.84159200 | 0.59545800  |

|   |             |             |             |
|---|-------------|-------------|-------------|
| C | -4.51659100 | -0.23891300 | 0.55575100  |
| C | -3.97796600 | -1.51211400 | 0.80918800  |
| H | -5.52614000 | -0.00868800 | 0.88456000  |
| H | -4.58118800 | -2.25435700 | 1.32572900  |
| C | -0.02337500 | -2.20566500 | -1.17424500 |
| H | -0.02306500 | -2.91063600 | -0.33637700 |
| H | -0.53203500 | -2.68239200 | -2.02669500 |
| H | 1.01692400  | -2.01368800 | -1.44345500 |

**TS-e-mx: E= -843.2605812 a.u**

l imaginary frequency = -422.8351 cm<sup>-1</sup>

|   |             |             |             |
|---|-------------|-------------|-------------|
| C | 2.24992900  | -0.89252200 | -0.27132200 |
| C | 1.40616400  | 1.16193800  | -0.88491900 |
| C | 0.37499800  | 0.17289600  | -1.01945400 |
| C | -0.86658700 | 0.59363600  | 0.51178400  |
| O | 0.60987100  | 2.24604200  | 0.80308100  |
| H | -0.25752000 | 0.05034100  | 1.23188500  |
| N | -0.64856500 | 1.93945800  | 0.65420600  |
| C | -1.45568700 | 2.96296300  | -0.00733000 |
| H | -2.52020500 | 2.75325800  | 0.11117400  |
| H | -1.20720800 | 3.91374300  | 0.46608800  |
| H | -1.20675800 | 3.02768200  | -1.07685600 |
| H | 1.41176600  | 2.11100200  | -1.39960700 |
| H | -0.34328600 | 0.18164100  | -1.83593100 |
| C | -2.22966300 | 0.02365800  | 0.31740100  |
| C | -2.73546800 | -0.86587800 | 1.28103000  |
| C | -3.01748700 | 0.28818700  | -0.81619700 |
| C | -3.99119600 | -1.45214500 | 1.13163300  |
| H | -2.13671400 | -1.08829400 | 2.16100100  |
| C | -4.27553800 | -0.29594300 | -0.96660400 |
| H | -2.64304200 | 0.94803900  | -1.59357000 |
| C | -4.76804800 | -1.16650500 | 0.00689000  |
| H | -4.36393000 | -2.13034300 | 1.89460700  |
| H | -4.86795900 | -0.07592600 | -1.85077900 |
| H | -5.74681300 | -1.62292300 | -0.11264900 |
| C | 2.57724700  | 0.48623200  | -0.39904900 |
| N | 0.97066900  | -1.09225100 | -0.74743500 |
| C | 0.24275900  | -2.33780700 | -0.68262200 |
| H | -0.14333300 | -2.56124200 | 0.32297500  |
| H | -0.60644300 | -2.29527000 | -1.37037900 |
| H | 0.89378600  | -3.16207300 | -0.99296700 |
| C | 3.16941500  | -1.81674500 | 0.24078300  |
| C | 3.86185100  | 0.92546900  | -0.05262200 |
| H | 2.91275500  | -2.86492900 | 0.36420100  |

|   |            |             |             |
|---|------------|-------------|-------------|
| H | 4.12201600 | 1.97656500  | -0.14650000 |
| C | 4.43806700 | -1.34970800 | 0.57849100  |
| C | 4.78769300 | 0.00496900  | 0.42923700  |
| H | 5.17292300 | -2.05016600 | 0.96717600  |
| H | 5.78557500 | 0.33393300  | 0.70531000  |

**TS-e-on: E=** -843.2666359 a.u

1 imaginary frequency = -449.8871 cm<sup>-1</sup>

|   |             |             |             |
|---|-------------|-------------|-------------|
| C | 2.23213000  | 0.67130700  | -0.20597200 |
| C | 0.98959700  | 0.81622400  | -0.87584000 |
| C | 0.36908200  | 2.06716800  | -0.89516800 |
| C | 0.96207600  | 3.13557800  | -0.21426000 |
| C | 2.15804100  | 2.95621400  | 0.49281800  |
| C | 2.80948600  | 1.71830600  | 0.51201300  |
| C | 1.73211300  | -1.35980900 | -1.09414400 |
| C | 0.62430100  | -0.49669200 | -1.41244500 |
| H | -0.56942700 | 2.20616300  | -1.42487400 |
| H | 0.48609700  | 4.11228400  | -0.22649700 |
| H | 2.59591600  | 3.79359400  | 1.02981800  |
| H | 3.74370700  | 1.59213000  | 1.05164000  |
| N | 2.70280900  | -0.62003600 | -0.42824400 |
| C | 3.82837500  | -1.22002800 | 0.25256200  |
| H | 3.57258100  | -1.52388400 | 1.27661300  |
| H | 4.14498200  | -2.10992600 | -0.29785700 |
| H | 4.66501300  | -0.51523800 | 0.28319800  |
| C | -0.88745000 | -1.46809100 | -0.29497500 |
| O | 0.94055800  | -2.64760000 | 0.20535100  |
| N | -0.11172200 | -2.00083300 | 0.68759400  |
| C | 0.06959200  | -1.42129200 | 2.01724500  |
| H | -0.90251200 | -1.18837200 | 2.45691200  |
| H | 0.56760400  | -2.18263700 | 2.61978000  |
| H | 0.68944500  | -0.51639900 | 1.99563800  |
| C | -2.07579700 | -0.61712200 | -0.06438000 |
| C | -3.25530100 | -0.93744300 | -0.76222200 |
| C | -2.08369200 | 0.52249900  | 0.76063800  |
| C | -4.40921400 | -0.17086600 | -0.62020700 |
| H | -3.26409000 | -1.80681500 | -1.41537000 |
| C | -3.24118500 | 1.28767400  | 0.90516000  |
| H | -1.17826700 | 0.83188700  | 1.26782000  |
| C | -4.40800800 | 0.94391400  | 0.22110900  |
| H | -5.30962600 | -0.44514100 | -1.16341400 |
| H | -3.22481000 | 2.16402400  | 1.54765900  |
| H | -5.30666000 | 1.54395300  | 0.33606600  |
| H | -1.01093600 | -2.18867500 | -1.09826500 |
| H | 0.09408000  | -0.59374900 | -2.35343500 |

H 2.05996800 -2.21155500 -1.67528700

**TS-e-ox: E= -843.2679725 a.u**

1 imaginary frequency = -435.7547 cm<sup>-1</sup>

C 2.51074900 0.46859800 0.14320300  
C 1.25049000 0.83273400 0.67905400  
C 0.87751700 2.17762400 0.69932500  
C 1.75621400 3.13600300 0.18615900  
C 2.98822900 2.75486500 -0.36328300  
C 3.38112300 1.41448200 -0.40010500  
C 1.51030400 -1.45368900 0.80884500  
C 0.55755300 -0.40672300 1.03824600  
H -0.08551300 2.47480400 1.10666200  
H 1.47905100 4.18645900 0.20643800  
H 3.65277600 3.51316900 -0.76904100  
H 4.33584700 1.12755400 -0.83123800  
N 2.67717500 -0.90488200 0.30558400  
C 3.75664300 -1.68571800 -0.25781700  
H 3.61647000 -1.85476000 -1.33292500  
H 4.71222800 -1.17731900 -0.09386000  
H 3.79171100 -2.65757500 0.24160900  
C -0.76001200 -0.74685700 -0.54950500  
O 0.66662200 -2.45542600 -0.77418800  
H -0.11112200 -0.22484700 -1.24555100  
N -0.60110800 -2.09265800 -0.67292600  
C -1.45360700 -3.08361400 -0.02606300  
H -2.50759500 -2.84934400 -0.18771400  
H -1.21485900 -4.04675900 -0.47962700  
H -1.24895300 -3.14397900 1.05355700  
H 1.57607800 -2.39416900 1.33774600  
H -0.15708400 -0.45829300 1.85267600  
C -2.06075400 -0.07633300 -0.30972100  
C -2.42685800 0.98292000 -1.15884100  
C -2.91399700 -0.38670400 0.76494300  
C -3.61658800 1.68327900 -0.96555700  
H -1.76962400 1.25177100 -1.98146300  
C -4.10522900 0.31119500 0.95714800  
H -2.63804900 -1.16424000 1.47005500  
C -4.46431400 1.34574700 0.09064700  
H -3.88040300 2.49316200 -1.64041100  
H -4.74919800 0.05337000 1.79382200  
H -5.39198400 1.89033000 0.24408800

**CA-e-mn: E= -843.3097458 a.u**

|   |             |             |             |
|---|-------------|-------------|-------------|
| C | 1.77804800  | -0.90991300 | 0.29547300  |
| C | 1.43549500  | 1.34467500  | 0.96611000  |
| C | 0.20130500  | 0.46017100  | 1.35638600  |
| C | -0.95224900 | 1.16591400  | 0.56741500  |
| O | 0.91807800  | 2.40891400  | 0.16888400  |
| N | -0.21991800 | 1.81509300  | -0.53303200 |
| C | -0.92067100 | 2.94368900  | -1.12499800 |
| H | -1.80997100 | 2.56097300  | -1.63318300 |
| H | -1.22028300 | 3.69334600  | -0.37388800 |
| H | -0.26642100 | 3.41636900  | -1.86177200 |
| C | -2.05727100 | 0.26745500  | 0.06589900  |
| C | -3.26802000 | 0.18902200  | 0.76523100  |
| C | -1.88783700 | -0.51661300 | -1.08497800 |
| C | -4.28594400 | -0.66511200 | 0.33778000  |
| H | -3.41569700 | 0.80409400  | 1.65056600  |
| C | -2.90819400 | -1.36423100 | -1.51711300 |
| H | -0.95662700 | -0.44459000 | -1.63660700 |
| C | -4.10785500 | -1.44546000 | -0.80542100 |
| H | -5.21898600 | -0.71394600 | 0.89312800  |
| H | -2.76632400 | -1.96260200 | -2.41349600 |
| H | -4.90071800 | -2.10722100 | -1.14406800 |
| H | -1.37865600 | 1.93007300  | 1.24333000  |
| H | -0.02951500 | 0.47246600  | 2.42839700  |
| H | 1.91324700  | 1.83975600  | 1.81779200  |
| C | 2.35347300  | 0.37216800  | 0.26313300  |
| N | 0.54573500  | -0.88840200 | 0.92894300  |
| C | 3.59061700  | 0.57952600  | -0.32375400 |
| C | 2.44819900  | -2.00541400 | -0.25916900 |
| H | 4.02520900  | 1.57607800  | -0.34678300 |
| H | 2.00983000  | -2.99877900 | -0.25074900 |
| C | 4.27277700  | -0.50895000 | -0.88737400 |
| C | 3.69970700  | -1.78205500 | -0.84611100 |
| H | 5.24220800  | -0.36252500 | -1.35446400 |
| H | 4.23227700  | -2.62349000 | -1.28284200 |
| C | -0.10077500 | -2.07204800 | 1.45247900  |
| H | -0.76804400 | -1.78762200 | 2.27186300  |
| H | -0.70630500 | -2.59068200 | 0.69777700  |
| H | 0.64460600  | -2.77678800 | 1.84662800  |

**CA-e-mx: E= -843.3097458 a.u**

|   |             |             |             |
|---|-------------|-------------|-------------|
| C | 2.34094000  | -0.83735100 | 0.04562400  |
| C | 1.12325300  | 1.02836400  | -0.74896200 |
| C | 0.17063100  | -0.18036200 | -0.50937500 |
| C | -0.92396900 | 0.42234200  | 0.42392000  |
| O | 0.72077100  | 2.00295300  | 0.21950000  |

|   |             |             |             |
|---|-------------|-------------|-------------|
| H | -0.65435500 | 0.14425600  | 1.45574900  |
| N | -0.73638400 | 1.87427100  | 0.20997000  |
| C | -1.20253400 | 2.69666900  | 1.31576100  |
| H | -2.28974600 | 2.59445100  | 1.37727200  |
| H | -0.75040600 | 2.40258700  | 2.27682200  |
| H | -0.95545000 | 3.74068900  | 1.10740000  |
| H | 1.01480700  | 1.45151300  | -1.75587200 |
| H | -0.26851300 | -0.55612000 | -1.44284900 |
| C | -2.34384000 | -0.00827200 | 0.12859900  |
| C | -3.00458500 | -0.89729100 | 0.98543000  |
| C | -3.01277100 | 0.44726200  | -1.01713900 |
| C | -4.29932900 | -1.33586000 | 0.70026900  |
| H | -2.50193300 | -1.24440200 | 1.88567700  |
| C | -4.30817700 | 0.01519700  | -1.29969700 |
| H | -2.51425800 | 1.15689800  | -1.67054400 |
| C | -4.95453100 | -0.88102700 | -0.44449000 |
| H | -4.79676200 | -2.02617800 | 1.37655600  |
| H | -4.81557800 | 0.38006600  | -2.18907100 |
| H | -5.96371400 | -1.21745100 | -0.66675900 |
| C | 2.48464100  | 0.47503600  | -0.44335700 |
| N | 0.99927400  | -1.20891200 | 0.12500300  |
| C | 0.58610900  | -2.59550700 | 0.03981800  |
| H | 1.11173500  | -3.19342100 | 0.79079200  |
| H | -0.48469300 | -2.66630100 | 0.24972900  |
| H | 0.77624000  | -3.04029600 | -0.95246500 |
| C | 3.46938100  | -1.58975900 | 0.38824700  |
| C | 3.73876600  | 1.05237700  | -0.57665400 |
| H | 3.38066700  | -2.60825700 | 0.75356200  |
| H | 3.83685700  | 2.06657300  | -0.95569000 |
| C | 4.72786200  | -0.99597300 | 0.24888100  |
| C | 4.87376000  | 0.31085300  | -0.22458600 |
| H | 5.61175400  | -1.57243800 | 0.51075000  |
| H | 5.86331000  | 0.74649800  | -0.32560100 |

**CA-e-on: E= -843.3173551 a.u**

|   |             |             |             |
|---|-------------|-------------|-------------|
| C | 2.12271100  | 0.78465600  | -0.06836200 |
| C | 0.87466000  | 0.86595300  | -0.71494600 |
| C | 0.20216200  | 2.07638300  | -0.78580000 |
| C | 0.75810100  | 3.21131900  | -0.17477200 |
| C | 1.97518000  | 3.11082600  | 0.49967700  |
| C | 2.67623900  | 1.90022100  | 0.56447200  |
| C | 1.74503100  | -1.38248500 | -0.86909100 |
| C | 0.51874200  | -0.49704600 | -1.26651100 |
| H | -0.75421200 | 2.14486900  | -1.29686600 |
| H | 0.23584900  | 4.16239200  | -0.22087600 |



|   |             |             |             |
|---|-------------|-------------|-------------|
| H | 2.39669100  | 3.98922300  | 0.98241500  |
| H | 3.62545000  | 1.83933000  | 1.08784800  |
| N | 2.67710200  | -0.47721000 | -0.23206100 |
| C | 3.80092600  | -0.97704200 | 0.52471600  |
| H | 4.62552400  | -0.25571200 | 0.49610700  |
| H | 3.55090400  | -1.18349600 | 1.57588000  |
| H | 4.15107100  | -1.90898700 | 0.07051300  |
| C | -0.65098900 | -1.26943800 | -0.57323300 |
| O | 1.23843500  | -2.41736100 | -0.02945400 |
| N | 0.02889100  | -1.86353100 | 0.59094200  |
| C | -0.65605200 | -3.02080300 | 1.14769200  |
| H | -1.59329900 | -2.67735400 | 1.59359700  |
| H | -0.87008500 | -3.78893300 | 0.38648100  |
| H | -0.03004400 | -3.45715200 | 1.93016700  |
| C | -1.87323100 | -0.46926100 | -0.18393800 |
| C | -2.99059400 | -0.46339000 | -1.02887700 |
| C | -1.92170100 | 0.27357600  | 1.00446400  |
| C | -4.12720500 | 0.27959800  | -0.70704800 |
| H | -2.97041600 | -1.04763000 | -1.94665900 |
| C | -3.06288000 | 1.00537400  | 1.33388400  |
| H | -1.06208000 | 0.26824400  | 1.66590100  |
| C | -4.16653900 | 1.01637200  | 0.47849400  |
| H | -4.98368100 | 0.27345500  | -1.37620300 |
| H | -3.08671400 | 1.57319700  | 2.26035500  |
| H | -5.05293300 | 1.58997100  | 0.73642600  |
| H | -0.96042000 | -2.06904300 | -1.27050400 |
| H | 0.34875600  | -0.47559100 | -2.34736900 |
| H | 2.23285400  | -1.92157800 | -1.68867800 |

**CA-e-ox: E= -843.3174696 a.u**

|   |             |             |             |
|---|-------------|-------------|-------------|
| C | -2.59184800 | 0.27493300  | -0.27231900 |
| C | -1.33500600 | 0.90819000  | -0.31290100 |
| C | -1.22279900 | 2.25967000  | -0.02626400 |
| C | -2.37068100 | 2.98506200  | 0.32986400  |
| C | -3.60725400 | 2.34212600  | 0.39559400  |
| C | -3.73805400 | 0.97916500  | 0.09923300  |
| C | -1.10299400 | -1.43847200 | -0.74864000 |
| C | -0.28643800 | -0.11333700 | -0.69285100 |
| H | -0.25378000 | 2.75180500  | -0.06748700 |
| H | -2.29394000 | 4.04379600  | 0.55960200  |
| H | -4.49146300 | 2.90542200  | 0.68319200  |
| H | -4.70636700 | 0.49193000  | 0.15961800  |
| N | -2.48377100 | -1.05338600 | -0.68344400 |
| C | -3.53243800 | -2.03466000 | -0.50705700 |

|   |             |             |             |
|---|-------------|-------------|-------------|
| H | -3.70457500 | -2.29217700 | 0.54851400  |
| H | -4.47007000 | -1.66112500 | -0.93363200 |
| H | -3.25696500 | -2.94783100 | -1.04267800 |
| C | 0.78281200  | -0.41361900 | 0.40461500  |
| O | -0.70443100 | -2.15358100 | 0.43215100  |
| H | 0.43691800  | 0.02902800  | 1.35212000  |
| N | 0.73291000  | -1.89176400 | 0.48404700  |
| C | 1.17826500  | -2.42842100 | 1.76040100  |
| H | 2.24319000  | -2.20251100 | 1.86607700  |
| H | 0.62581800  | -1.99991400 | 2.61241900  |
| H | 1.04473700  | -3.51319400 | 1.75472400  |
| H | -0.89640500 | -2.06494200 | -1.62538000 |
| H | 0.19662300  | 0.11289400  | -1.64862500 |
| C | 2.17838700  | 0.08364100  | 0.09693200  |
| C | 2.70431000  | 1.18181200  | 0.78759400  |
| C | 2.95867800  | -0.52675400 | -0.89606400 |
| C | 3.97665400  | 1.67225800  | 0.48619100  |
| H | 2.11243800  | 1.65582300  | 1.56749400  |
| C | 4.23234900  | -0.04323500 | -1.19247500 |
| H | 2.56367600  | -1.39337800 | -1.41767600 |
| C | 4.74419300  | 1.06055600  | -0.50529300 |
| H | 4.36856300  | 2.52726400  | 1.03085700  |
| H | 4.82790700  | -0.52926800 | -1.96103600 |
| H | 5.73635400  | 1.43758700  | -0.73889500 |
